# Supplementary material for: The diagnosis of scabies by non-expert examiners: A study of diagnostic accuracy
Source: PubMed Central journal article supplement (PMC6715246; doi:10.1371/journal.pntd.0007635), 2019-08-19
Supplement: pntd.0007635.s001.pdf [file pntd.0007635.s001.pdf]

**S1 Table: Accuracy of moderate to severe scabies diagnosis**

|         | Participants Screened (n) |     |    |     |       | Measurement of accuracy (95%CI) |                     |                     |                      |                     |
|---------|---------------------------|-----|----|-----|-------|---------------------------------|---------------------|---------------------|----------------------|---------------------|
|         | TP                        | FP  | FN | TN  | Total | Sensitivity                     | Specificity         | PPV                 | NPV                  | OR                  |
| Nurse A | 29                        | 41  | 2  | 99  | 171   | 93.5<br>(78.6-99.2)             | 70.7<br>(62.4-78.1) | 41.4<br>(29.8-53.8) | 98.0<br>(93-99.8)    | 35.0<br>(8.78-)     |
| Nurse B | 30                        | 37  | 1  | 103 | 171   | 96.8<br>(83.3-99.9)             | 73.6<br>(65.5-80.7) | 44.8<br>(32.6-57.4) | 99.0<br>(94.8-100.0) | 83.5<br>(13.8-)     |
| Nurse C | 25                        | 14  | 6  | 126 | 171   | 80.6<br>(62.5-92.5)             | 90<br>(83.8-94.4)   | 64.1<br>(47.2-78.8) | 95.5<br>(90.4-98.3)  | 37.5<br>(13.4-105)  |
| Nurse D | 28                        | 35  | 3  | 105 | 171   | 90.3<br>(74.2-98.0)             | 75.0<br>(67.0-81.9) | 44.4<br>(31.9-57.5) | 97.2<br>(92.1-99.4)  | 28<br>(8.47-91.5)   |
| Total   | 112                       | 127 | 12 | 433 | 684   | 90.3<br>(83.7-94.9)             | 77.3<br>(73.6-80.7) | 46.9<br>(40.4-53.4) | 97.3<br>(95.3-98.6)  | 31.8<br>(17.1-59.1) |

TP = true positive, FP = false positive, FN = false negative, TN = true negative
