# Supplementary material for: The diagnosis of scabies by non-expert examiners: A study of diagnostic accuracy
Source: PubMed Central journal article supplement (PMC6715246; doi:10.1371/journal.pntd.0007635), 2019-08-19
Supplement: pntd.0007635.s002.pdf [file pntd.0007635.s002.pdf]

**S2 Table: Consistency in the reporting of history features**

|                                     | <b>N</b> | <b>Agreement<br/>%</b> | <b>Fleiss'<br/>Kappa</b> | <b>95% CI</b> |
|-------------------------------------|----------|------------------------|--------------------------|---------------|
| <b>Itch</b>                         |          |                        |                          |               |
| Self-reported itch                  | 83       | 82.8                   | 0.63                     | 0.52-0.75     |
| <b>Contact history</b>              |          |                        |                          |               |
| Household contact with itch         | 80       | 81.1                   | 0.60                     | 0.50-0.71     |
| School contact with itch            | 79       | 73.8                   | 0.43                     | 0.31-0.55     |
| Household contact with scabies rash | 79       | 82.5                   | 0.59                     | 0.48-0.70     |
| School contact with scabies rash    | 80       | 76.8                   | 0.50                     | 0.38-0.61     |
| Any positive contact history*       | 81       | 84.0                   | 0.52                     | 0.37-0.67     |

\*Answered yes to any contact history questions
